# Supplementary material for: Developmental Effects of the ToxCast™ Phase I and Phase II Chemicals in Caenorhabditis elegans and Corresponding Responses in Zebrafish, Rats, and Rabbits
Source: PubMed Central journal article supplement (PMC4858399; doi:10.1289/ehp.1409645), 2015-10-23
Supplement: ehp.1409645.s001.acco.pdf [file ehp.1409645.s001.acco.pdf]

**Note to readers with disabilities:** *EHP* strives to ensure that all journal content is accessible to all readers. However, some figures and Supplemental Material published in *EHP* articles may not conform to [508 standards](#) due to the complexity of the information being presented. If you need assistance accessing journal content, please contact [ehp508@niehs.nih.gov](mailto:ehp508@niehs.nih.gov). Our staff will work with you to assess and meet your accessibility needs within 3 working days.

## **Supplemental Material**

# **Developmental Effects of the ToxCast™ Phase I and II Chemicals in *Caenorhabditis elegans* and Corresponding Responses in Zebrafish, Rats, and Rabbits**

Windy A. Boyd, Marjolein V. Smith, Carroll A. Co, Jason R. Pirone, Julie R. Rice, Keith R. Shockley, and Jonathan H. Freedman

### **Table of Contents**

**Table S1.** Estimated Z-factors and summary statistics using 4% DMSO with vehicle control

**Table S2.** Estimated Z-factors and summary statistics using parathion

**Table S3.** Estimated Z-factors and summary statistics using dichlorvos

**Table S4.** Description of chemicals in the lower panel of Figure 4

**Figure S1.** Effect of DMSO (vehicle control) on *C. elegans* growth. The red dashed line indicates the AC<sub>50</sub> (half-maximal concentration; 3.1 % DMSO); the blue dashed line indicates the benchmark concentration lower limit (1.6 % DMSO), below which no effect was observed compared to the untreated control. The benchmark concentration was calculated using mean nematode sizes for exposure wells, with size at time = 0 subtracted from the size at t=48 h. The definition of Crump (2002) was used to calculate the BMC with bootstrapping on residuals for the 90% one-sided confidence interval as previously described (Boyd et al. 2010a; Crump 2002).

### **Supplemental Code and Data Zip File**

**Excel Table S1.** ToxCast Phase I mean log(EXT) values and weighted t-test Bonferoni-corrected p-values

**Excel Table S2.** Phase I and II *C. elegans* and zebrafish toxicity estimates

**Table S1.** Estimated Z-factors and summary statistics using 4% DMSO with vehicle control.

| <b>Plate<br/>Number</b> | <b>Z-factor</b> | <b>Standard Deviation<br/>(negative control)</b> | <b>Standard Deviation<br/>(positive control)</b> | <b>Mean<br/>(negative control)</b> | <b>Mean<br/>(positive control)</b> |
|-------------------------|-----------------|--------------------------------------------------|--------------------------------------------------|------------------------------------|------------------------------------|
| <b>1</b>                | 0.8113          | 0.0628                                           | 0.0640                                           | 5.8411                             | 3.8252                             |
| <b>2</b>                | 0.3960          | 0.0572                                           | 0.3016                                           | 5.8322                             | 4.0496                             |
| <b>3</b>                | 0.8762          | 0.0551                                           | 0.0416                                           | 5.9068                             | 3.5642                             |
| <b>4</b>                | 0.8264          | 0.0618                                           | 0.0655                                           | 5.7675                             | 3.5671                             |
| <b>5</b>                | 0.4678          | 0.0446                                           | 0.2511                                           | 5.7687                             | 4.1021                             |
| <b>6</b>                | 0.8683          | 0.0295                                           | 0.0780                                           | 5.7737                             | 3.3251                             |
| <b>7</b>                | 0.7080          | 0.0606                                           | 0.0669                                           | 5.8553                             | 4.5454                             |
| <b>8</b>                | 0.6139          | 0.0771                                           | 0.0961                                           | 5.7169                             | 4.3707                             |
| <b>9</b>                | 0.8395          | 0.0330                                           | 0.0775                                           | 5.8052                             | 3.7388                             |
| <b>10</b>               | 0.5768          | 0.1079                                           | 0.2145                                           | 5.9039                             | 3.6183                             |

Using the 10 replicate plates in the preliminary experiment, the Z-factor and summary statistics were calculated using 4% DMSO as positive control. The summary statistics include standard deviations and means for the negative control (1% DMSO) as well as the positive control (4% DMSO).

**Table S2.** Estimated Z-factors and summary statistics using parathion.

| <b>Plate<br/>Number</b> | <b>Z-factor</b> | <b>Standard Deviation<br/>(negative control)</b> | <b>Standard Deviation<br/>(positive control)</b> | <b>Mean<br/>(negative control)</b> | <b>Mean<br/>(positive control)</b> |
|-------------------------|-----------------|--------------------------------------------------|--------------------------------------------------|------------------------------------|------------------------------------|
| <b>1</b>                | 0.7620          | 0.0628                                           | 0.1227                                           | 5.8411                             | 3.5036                             |
| <b>2</b>                | 0.7310          | 0.0572                                           | 0.1557                                           | 5.8322                             | 3.4572                             |
| <b>3</b>                | 0.8292          | 0.0551                                           | 0.0827                                           | 5.9068                             | 3.4870                             |
| <b>4</b>                | 0.8065          | 0.0618                                           | 0.0895                                           | 5.7675                             | 3.4228                             |
| <b>5</b>                | 0.7546          | 0.0446                                           | 0.1530                                           | 5.7687                             | 3.3531                             |
| <b>6</b>                | 0.8618          | 0.0295                                           | 0.0801                                           | 5.7737                             | 3.3938                             |
| <b>7</b>                | 0.7740          | 0.0606                                           | 0.1140                                           | 5.8553                             | 3.5372                             |
| <b>8</b>                | 0.6805          | 0.0771                                           | 0.1814                                           | 5.7169                             | 3.2893                             |
| <b>9</b>                | 0.8894          | 0.0330                                           | 0.0496                                           | 5.8052                             | 3.5646                             |
| <b>10</b>               | 0.7020          | 0.1079                                           | 0.1360                                           | 5.9039                             | 3.4490                             |

Using the 10 replicate plates in the preliminary experiment, the Z-factor and summary statistics were calculated using 200  $\mu$ M parathion as positive control. The summary statistics include standard deviations and means for the negative control (1% DMSO) as well as the positive control (Parathion).

**Table S3.** Estimated Z-factors and summary statistics using dichlorvos.

| <b>Plate Number</b> | <b>Z-factor</b> | <b>Standard Deviation<br/>(negative control)</b> | <b>Standard Deviation<br/>(positive control)</b> | <b>Mean<br/>(negative control)</b> | <b>Mean<br/>(positive control)</b> |
|---------------------|-----------------|--------------------------------------------------|--------------------------------------------------|------------------------------------|------------------------------------|
| <b>1</b>            | 0.8676          | 0.0628                                           | 0.0513                                           | 5.8411                             | 3.2570                             |
| <b>2</b>            | 0.8565          | 0.0572                                           | 0.0657                                           | 5.8322                             | 3.2618                             |
| <b>3</b>            | 0.8720          | 0.0551                                           | 0.0576                                           | 5.9068                             | 3.2649                             |
| <b>4</b>            | 0.8309          | 0.0618                                           | 0.0786                                           | 5.7675                             | 3.2781                             |
| <b>5</b>            | 0.8874          | 0.0446                                           | 0.0521                                           | 5.7687                             | 3.1920                             |
| <b>6</b>            | 0.8713          | 0.0295                                           | 0.0772                                           | 5.7737                             | 3.2864                             |
| <b>7</b>            | 0.8477          | 0.0606                                           | 0.0617                                           | 5.8553                             | 3.4451                             |
| <b>8</b>            | 0.8431          | 0.0771                                           | 0.0551                                           | 5.7169                             | 3.1873                             |
| <b>9</b>            | 0.9167          | 0.0330                                           | 0.0359                                           | 5.8052                             | 3.3231                             |
| <b>10</b>           | 0.7922          | 0.1079                                           | 0.0746                                           | 5.9039                             | 3.2689                             |

Using the 10 replicate plates in the preliminary experiment, the Z-factor and summary statistics were calculated using 200  $\mu$ M dichlorvos, as positive control. The summary statistics include standard deviations and means for the negative control (1% DMSO) as well as the positive control (Dichlorvos).

**Table S4.** Description of chemicals in the lower panel of Figure 4.

| Order<br>(1-most toxic) | CASRN       | Name in Figure 4                 | Chemical name                                                                                   | Classification           |
|-------------------------|-------------|----------------------------------|-------------------------------------------------------------------------------------------------|--------------------------|
| 1                       | 135080-03-4 | Pharma CP-100829                 | 6-chloro-3-[(4-chlorothiophen-2-yl)carbonyl]-5-fluoro-2-oxo-2,3-dihydro-1H-indole-1-carboxamide | failed pharmaceutical    |
| 2                       | 71751-41-2  | Abamectin                        | Abamectin                                                                                       | avermectin               |
| 3                       | 155569-91-8 | Emamectin benzoate               | Emamectin benzoate                                                                              | avermectin               |
| 4                       | 76-87-9     | Triphenyltin hydroxide           | Fentin                                                                                          | organotin                |
| 5                       | NOCAS       | Milbemectin                      | Milbemectin (mix of >70% Milbemycin A4 CAS 51596-11-3; <30% Milbemycin A3 CAS 51596-10-2)       | avermectin               |
| 6                       | 205-99-2    | Benzo[b]fluoranthene             | Benzo[b]fluoranthene                                                                            | PAH                      |
| 7                       | 50471-44-8  | Vinclozolin                      | Vinclozolin                                                                                     | fungicide/antiandrogenic |
| 8                       | 2921-88-2   | Chlorpyrifos                     | Chlorpyrifos                                                                                    | OP pesticide             |
| 9                       | 72-54-8     | DDD                              | p,p'-DDD                                                                                        | OC metabolite            |
| 10                      | 50-29-3     | DDT                              | p,p'-DDT                                                                                        | OC pesticide             |
| 11                      | 119446-68-3 | Difenoconazole                   | Difenoconazole                                                                                  | fungicide                |
| 12                      | 5598-15-2   | Chlorpyrifos oxon                | Chlorpyrifos oxon                                                                               | OP metabolite            |
| 13                      | 119168-77-3 | Tebufenpyrad                     | Tebufenpyrad                                                                                    | pyrazole insecticide     |
| 14                      | 1461-22-9   | Tributyltin chloride             | Tributyltin chloride                                                                            | organotin                |
| 15                      | 2155-70-6   | Tributyltin methacrylate         | Stannane, tributyl(2-methyl-1-oxo-2-propenyl)oxy-                                               | organotin                |
| 16                      | 42509-80-8  | Isazofos                         | Isazofos                                                                                        | OP pesticide             |
| 17                      | 124495-18-7 | Quinoxifen                       | Quinoxifen                                                                                      | fungicide                |
| 18                      | 548-62-9    | Hexamethyl-p-rosaniline chloride | Hexamethyl-p-rosaniline chloride                                                                | crystal violet           |
| 19                      | 111812-58-9 | Fenpyroximate (Z,E)              | (Z,E)-Fenpyroximate                                                                             | pyrazole insecticide     |

|    |             |                                    |                                                                       |                                         |
|----|-------------|------------------------------------|-----------------------------------------------------------------------|-----------------------------------------|
| 20 | 96489-71-3  | Pyridaben                          | Pyridaben                                                             | miticide/insecticide                    |
| 21 | 85-01-8     | Phenanthrene                       | Phenanthrene                                                          | PAH                                     |
| 22 | 78-48-8     | Tributyl phosphorotrithioate       | Tribufos                                                              | OP pesticide                            |
| 23 | 122-39-4    | Diphenylamine                      | Diphenylamine                                                         | Plant growth regulator; N containing    |
| 24 | 120-12-7    | Anthracene                         | Anthracene                                                            | PAH                                     |
| 25 | 153233-91-1 | Etoxazole                          | Etoxazole                                                             | miticide                                |
| 26 | 129-00-0    | Pyrene                             | Pyrene                                                                | PAH                                     |
| 27 | 101-20-2    | Triclocarban                       | 3,4,4'-Trichlorocarbanilide                                           | antimicrobial in personal care products |
| 28 | 56-72-4     | Coumaphos                          | Coumaphos                                                             | OP pesticide                            |
| 29 | 2104-64-5   | EPN                                | O-Ethyl O-(p-nitrophenyl) phenylphosphonothioate                      | OP pesticide                            |
| 30 | 62-38-4     | Phenylmercuric acetate             | Phenylmercuric acetate                                                | organic mercury salt                    |
| 31 | 191906      | Captafol                           | Captafol                                                              | fungicide                               |
| 32 | 72-55-9     | DDE                                | p,p'-DDE                                                              | OC metabolite                           |
| 33 | 42874-03-3  | Oxyfluorfen                        | Oxyfluorfen                                                           | herbicide                               |
| 34 | 2058-94-8   | Henicosafuoroundecanoic acid       | Perfluoroundecanoic acid                                              | perfluoroalkyls; fluorosurfactant       |
| 35 | 309-00-2    | Aldrin                             | Aldrin                                                                | OC pesticide                            |
| 36 | 143-50-0    | Kepone                             | Kepone (Chlordecone)                                                  | OC pesticide                            |
| 37 | 1836-75-5   | Nitrofen                           | 2,4-dichloro-1-(4-nitrophenoxy)benzene                                | alkyl halide                            |
| 38 | NOCAS_47366 | Pharma4736                         | 5-fluoro-1-(3-fluorobenzyl)-N-(1H-indol-5-yl)-1H-indole-2-carboxamide | failed pharmaceutical                   |
| 39 | 115-29-7    | Endosulfan                         | Endosulfan                                                            | OC pesticide                            |
| 40 | 173584-44-6 | Indoxacarb                         | Indoxacarb                                                            | oxadiazine insecticide                  |
| 41 | 76-44-8     | Heptachlor                         | Heptachlor                                                            | OC pesticide                            |
| 42 | 335-76-2    | Perfluorodecanoic acid             | Perfluorodecanoic acid                                                | perfluoroalkyls; fluorosurfactant       |
| 43 | 2795-39-3   | Potassium perfluorooctanesulfonate | Heptadecafluorooctanesulfonic acid potassium salt                     | perfluoroalkyls; fluorosurfactant       |

|    |            |                            |                            |                                   |
|----|------------|----------------------------|----------------------------|-----------------------------------|
| 44 | 115-32-2   | Dicofol                    | Dicofol                    | OC pesticide                      |
| 45 | 7487-94-7  | Mercuric chloride          | Mercuric chloride          | inorganic mercury salt            |
| 46 | 754-91-6   | Perfluorooctanesulfonamide | Perfluorooctanesulfonamide | perfluoroalkyls; fluorosurfactant |
| 47 | 57-74-9    | Chlordane                  | Chlordane                  | OC pesticide                      |
| 48 | 55285-14-8 | Carbosulfan                | Carbosulfan                | carbamate                         |
| 49 | 95737-68-1 | Pyriproxyfen               | Pyriproxyfen               | pyridine pesticide (fleas)        |
| 50 | 56-55-3    | Benz[a]anthracene          | Benz[a]anthracene          | PAH                               |

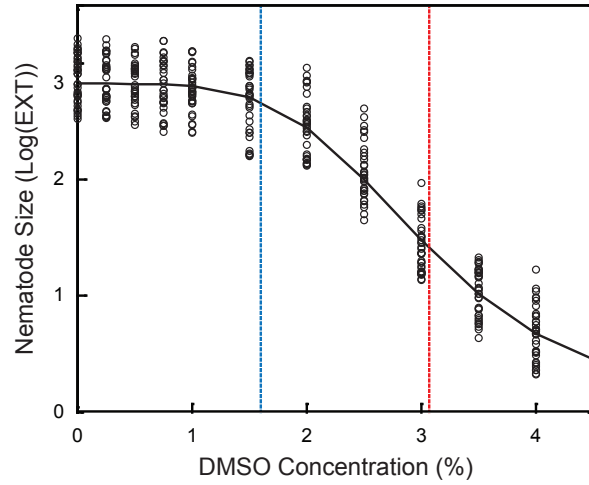

**Figure S1. Effect of DMSO (vehicle control) on *C. elegans* growth.** The red dashed line indicates the  $AC_{50}$  (half-maximal concentration; 3.1 % DMSO); the blue dashed line indicates the benchmark concentration lower limit (1.6 % DMSO), below which no effect was observed compared to the untreated control. The benchmark concentration was calculated using mean nematode sizes for exposure wells, with size at time = 0 subtracted from the size at t=48 h. The definition of Crump (2002) was used to calculate the BMC with bootstrapping on residuals for the 90% one-sided confidence interval as previously described (Boyd et al. 2010a; Crump 2002).
